# Supplementary material for: Unravelling the effect of data augmentation transformations in polyp segmentation
Source: Springer Nature journal article supplement (doi:10.1007/s11548-020-02262-4), 2020-09-28
Supplement: MOESM1 [file 18427040]

# Unravelling the effect of data augmentation transformations in polyp segmentation

*International Journal of Computer Assisted Radiology and Surgery*

Luisa F. Sánchez-Peralta\*, Artzai Picón, Francisco M. Sánchez-Margallo, J. Blas Pagador

\* Jesús Usón Minimally Invasive Surgery Centre. Cáceres (Spain)

<lfsanchez@ccmijesususon.com>

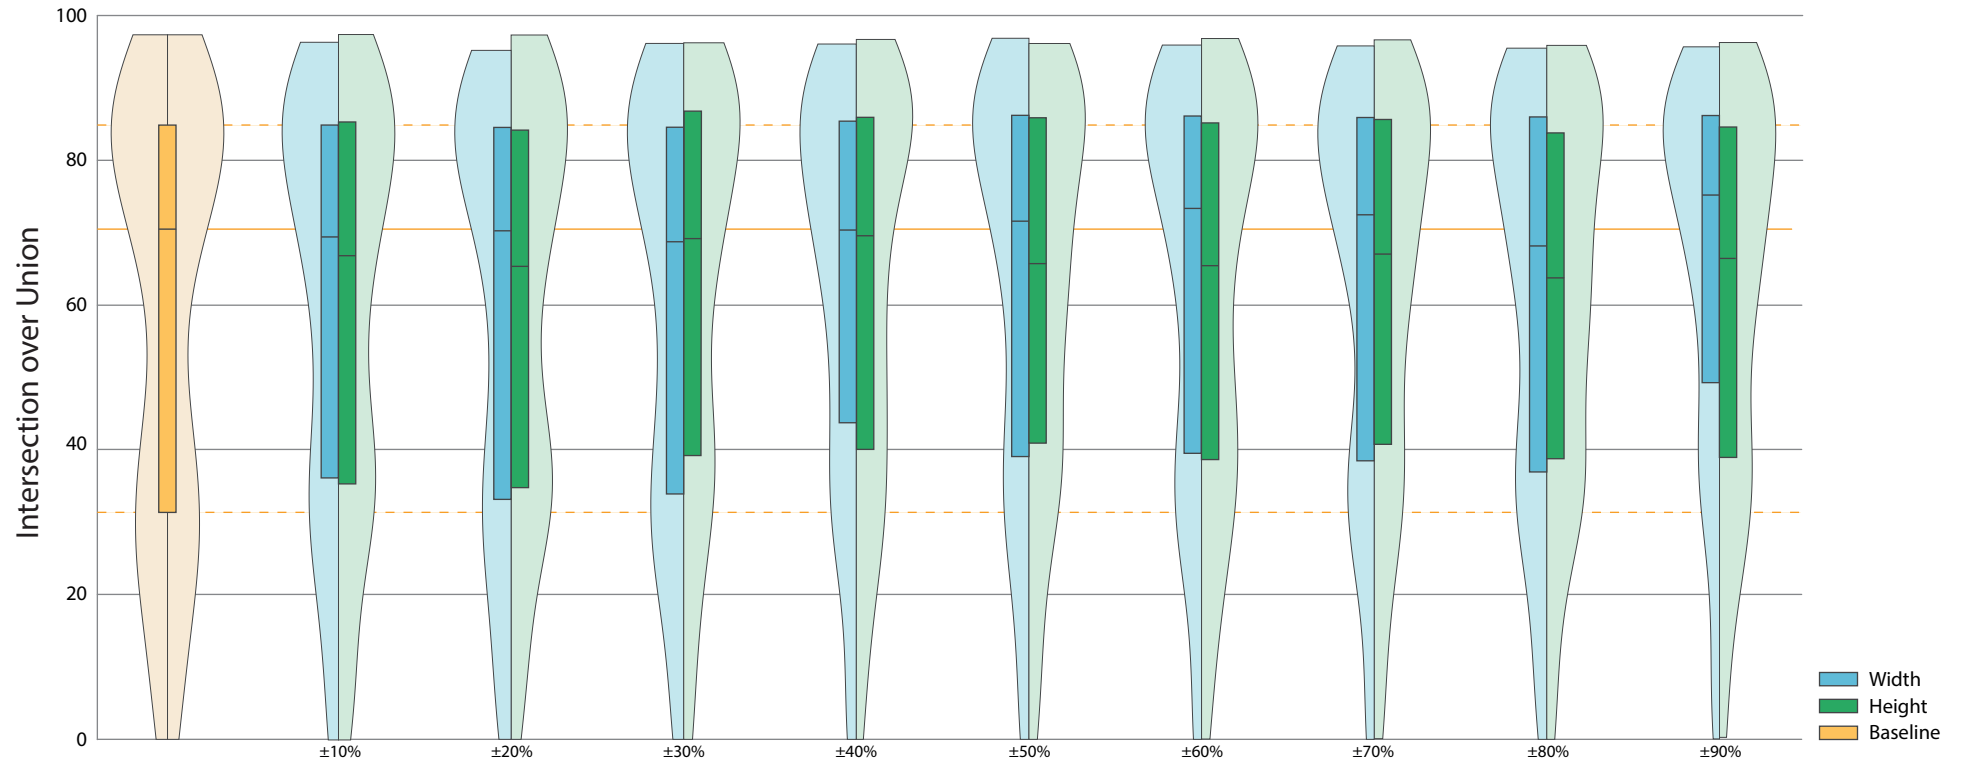

Fig S1.1. Results for width and height shifts for CVC-EndoSceneStill. Baseline is included. Its median and quartiles are prolonged on the background for reference.

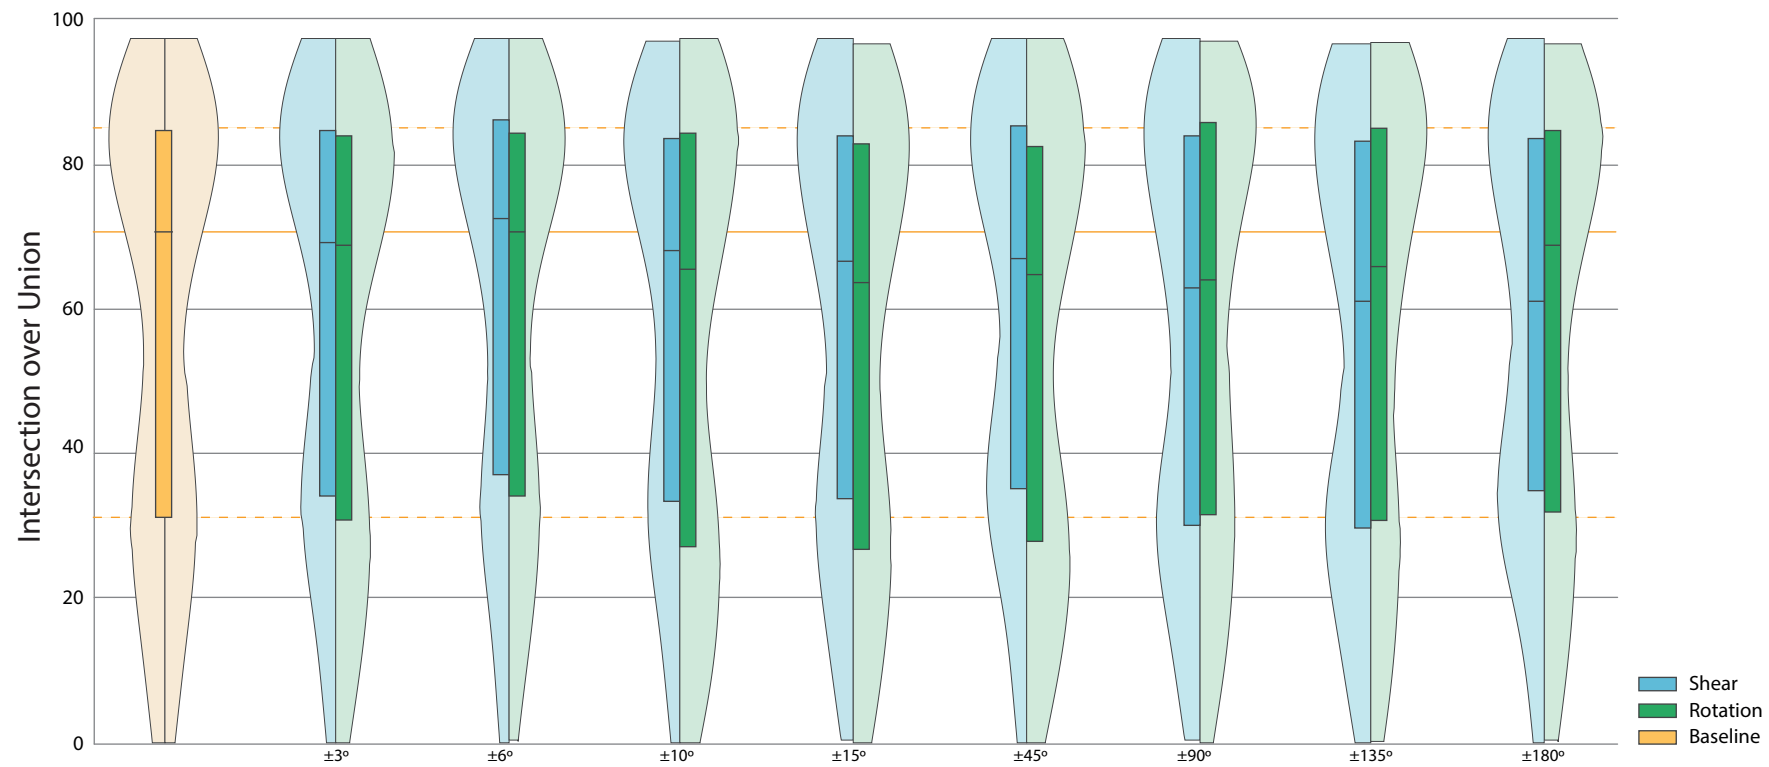

Fig S1.2. Results for rotation and shear for CVC-EndoSceneStill. Baseline is included. Its median and quartiles are prolonged on the background for reference.

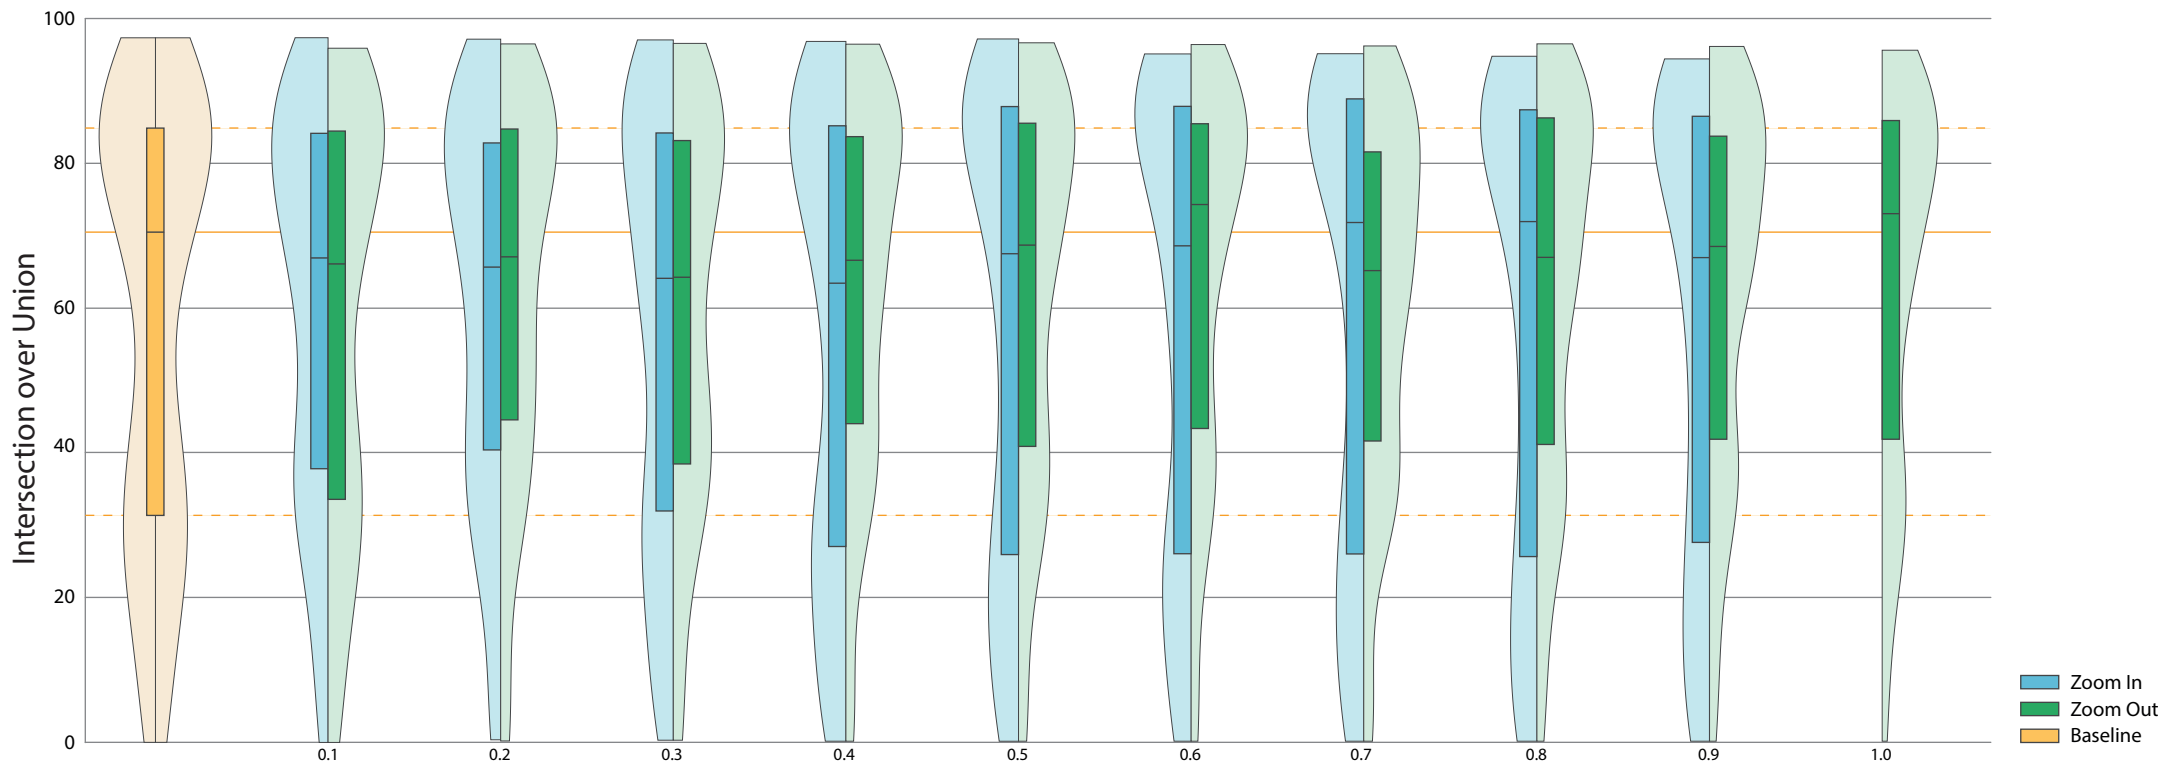

Fig S1.3. Results for zoom in and out for CVC-EndoSceneStill. Baseline is included. Its median and quartiles are prolonged on the background for reference.

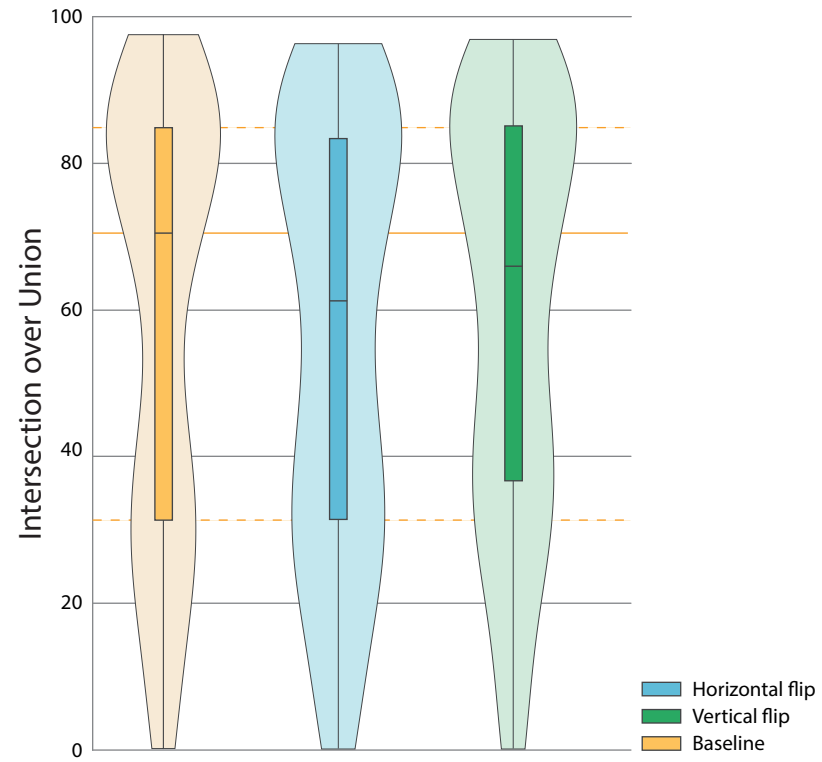

Fig S1.4. Results for horizontal and vertical flips for CVC-EndoSceneStill. Baseline is included. Its median and quartiles are prolonged on the background for reference.

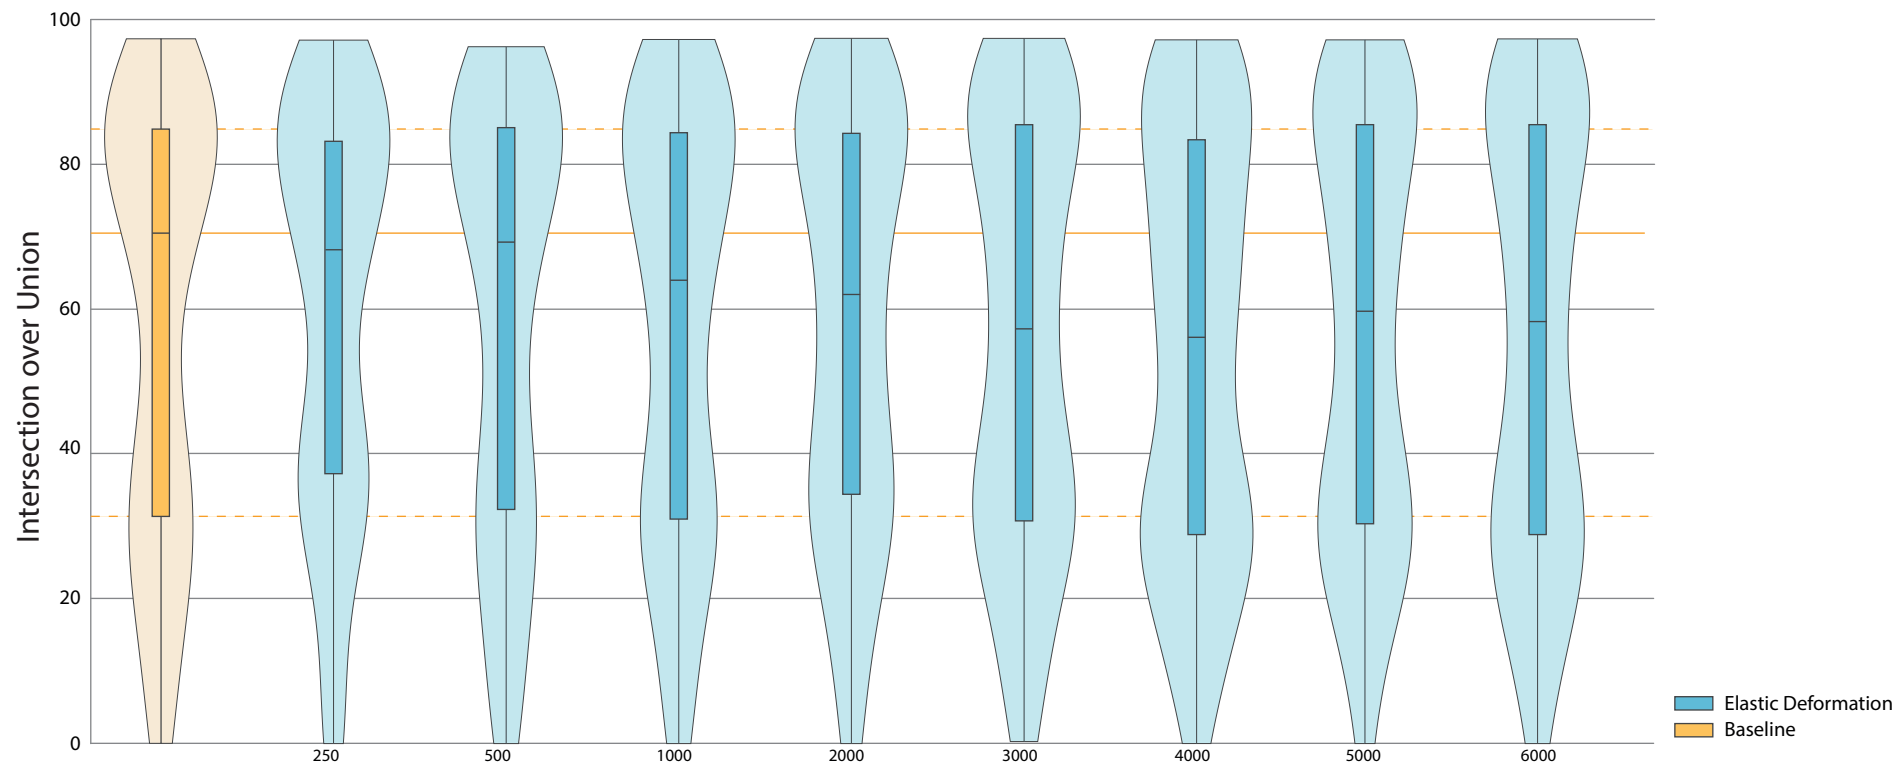

Fig S1.5. Results for elastic deformation for CVC-EndoSceneStill. Baseline is included. Its median and quartiles are prolonged on the background for reference.

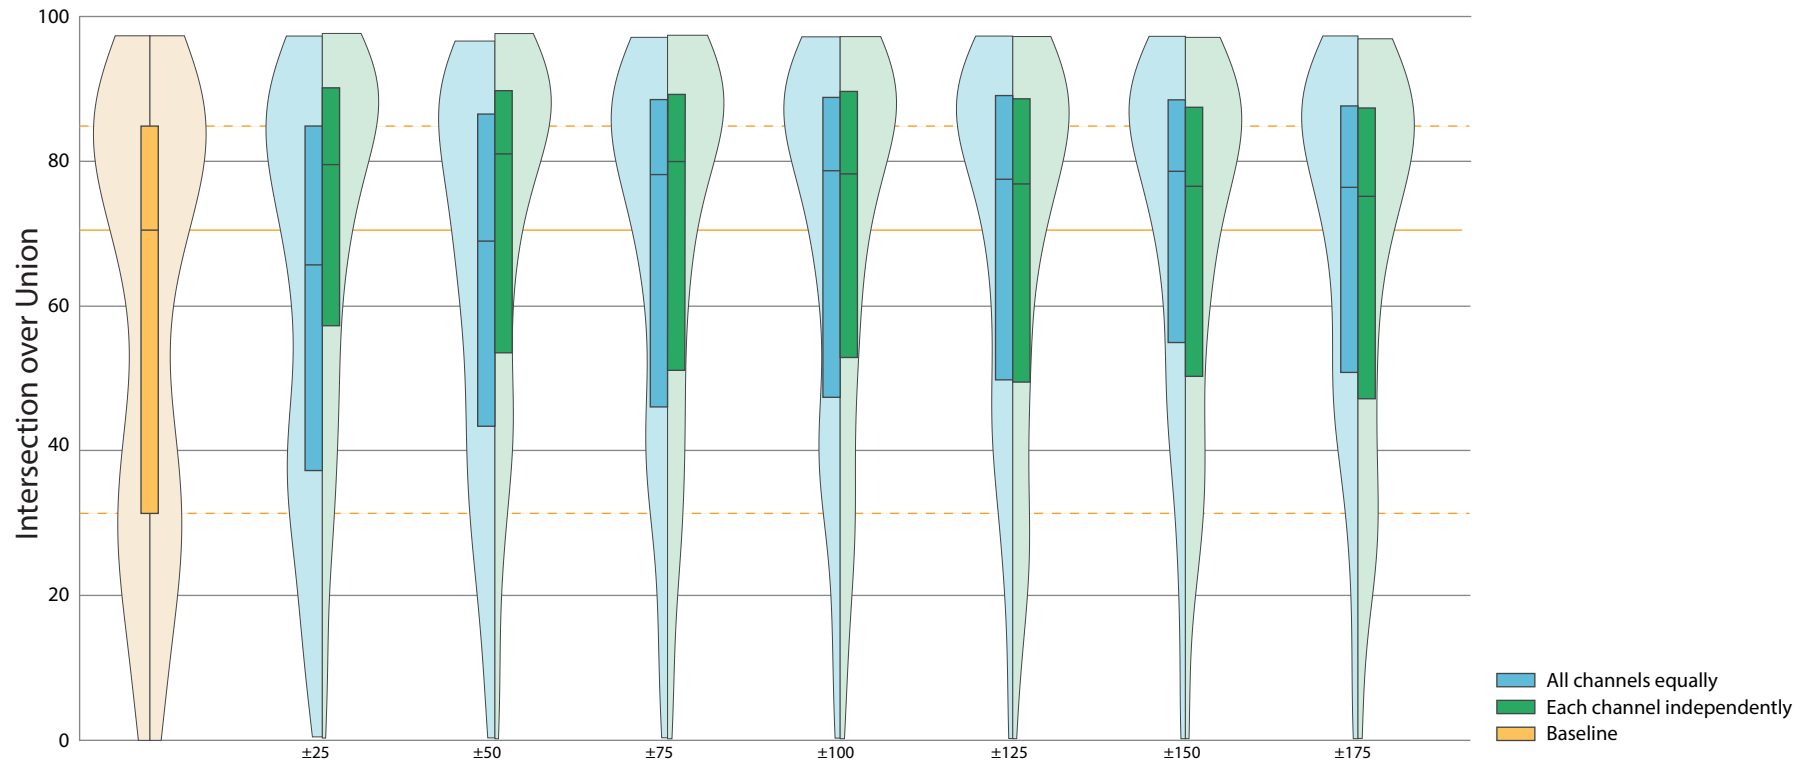

Fig S1.6. Results for changes in brightness for CVC-EndoSceneStill. Baseline is included. Its median and quartiles are prolonged on the background for reference.

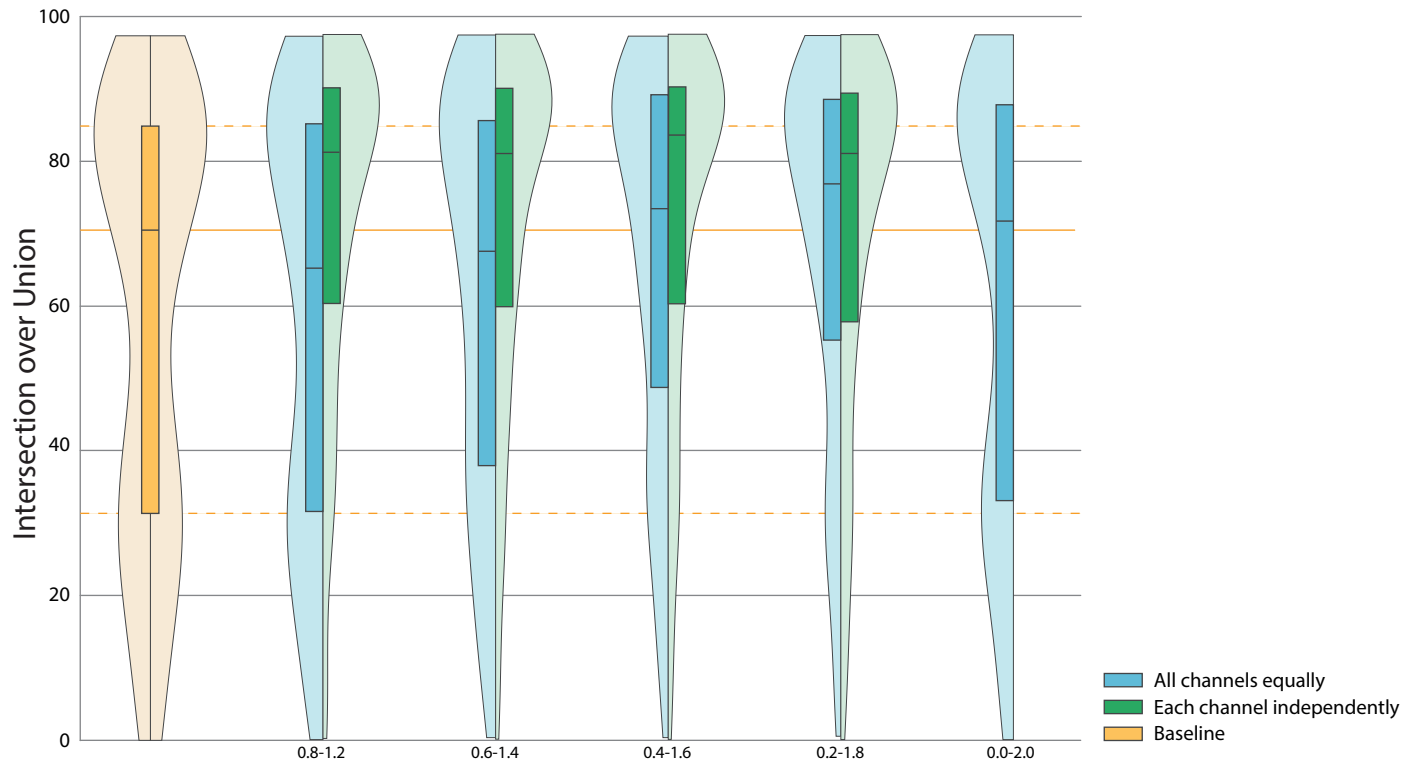

Fig S1.7. Results for changes in contrast for CVC-EndoSceneStill. Baseline is included. Its median and quartiles are prolonged on the background for reference.

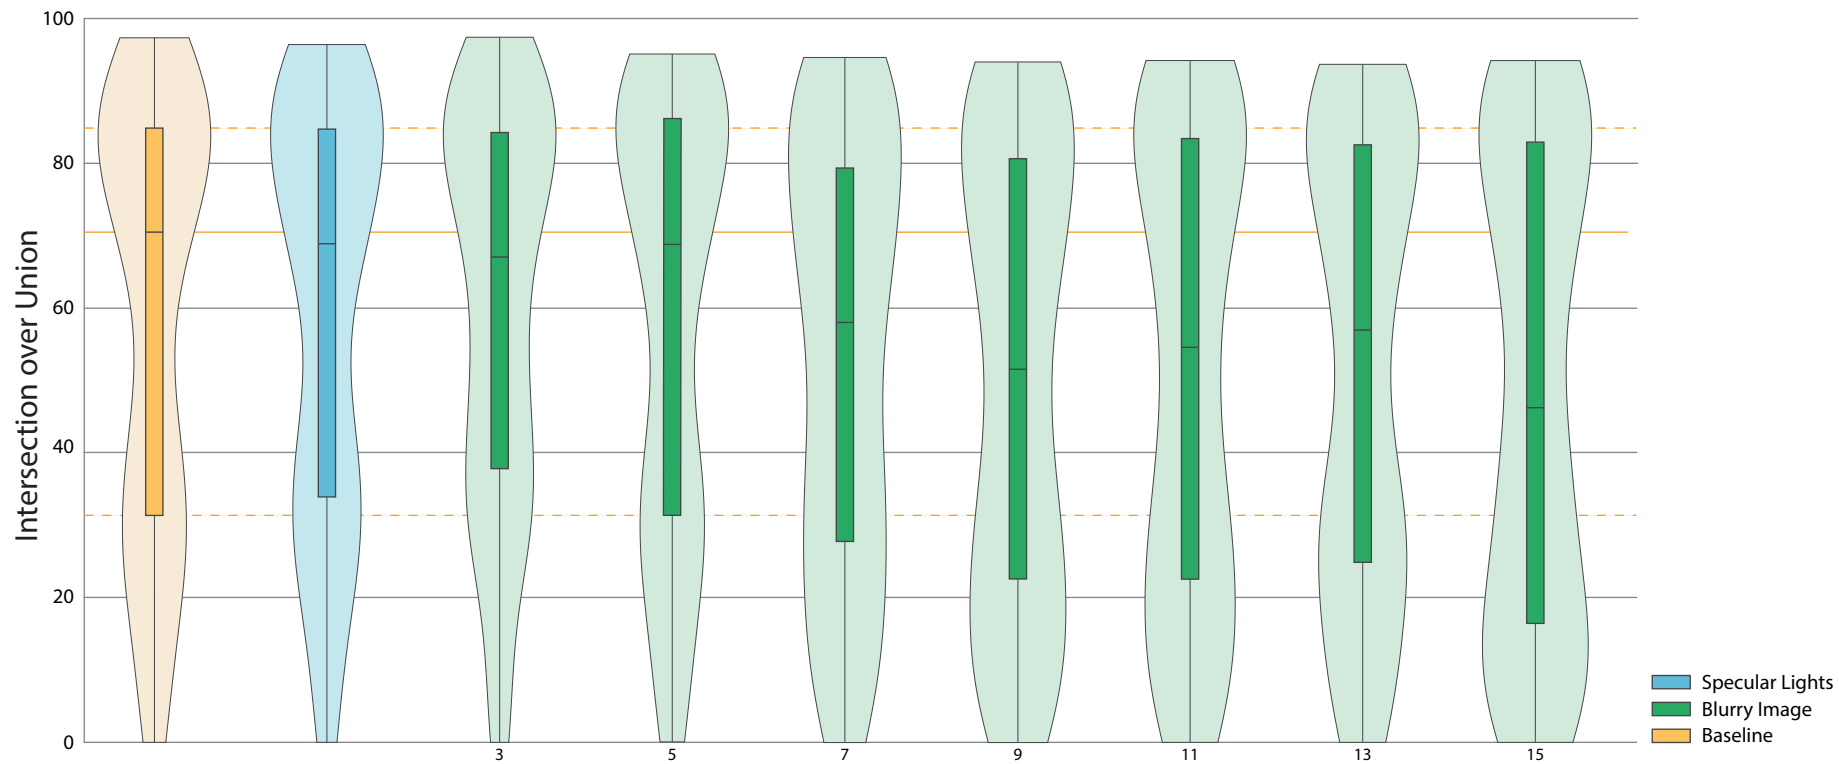

Fig S1.8. Results for inclusion of specular lights and blurry frames (mean filter) for CVC-EndoSceneStill. Baseline is included. Its median and quartiles are prolonged on the background for reference.
