# Supplementary material for: Unravelling the effect of data augmentation transformations in polyp segmentation
Source: Springer Nature journal article supplement (doi:10.1007/s11548-020-02262-4), 2020-09-28
Supplement: MOESM2 [file 18427040]

# Unravelling the effect of data augmentation transformations in polyp segmentation

*International Journal of Computer Assisted Radiology and Surgery*

Luisa F. Sánchez-Peralta\*, Artzai Picón, Francisco M. Sánchez-Margallo, J. Blas Pagador

\* Jesús Usón Minimally Invasive Surgery Centre. Cáceres (Spain)

<lfsanchez@ccmijesususon.com>

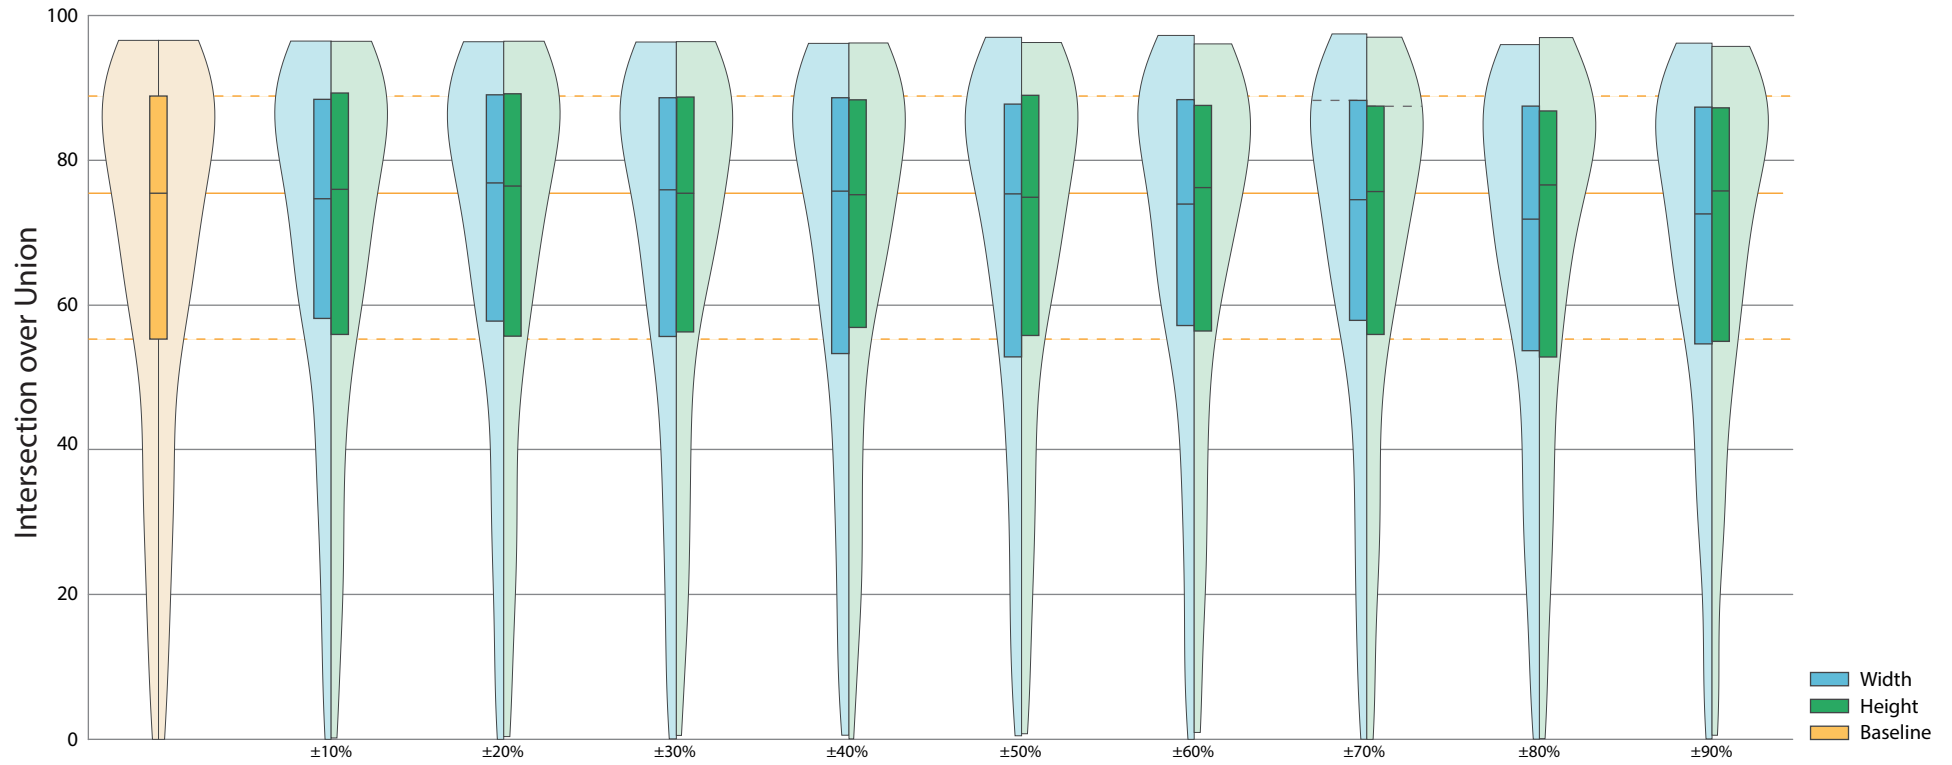

Fig S2.1. Results for width and heigh shifts for Kvasir-SEG. Baseline is included. Its median and quartiles are prolonged on the background for reference.

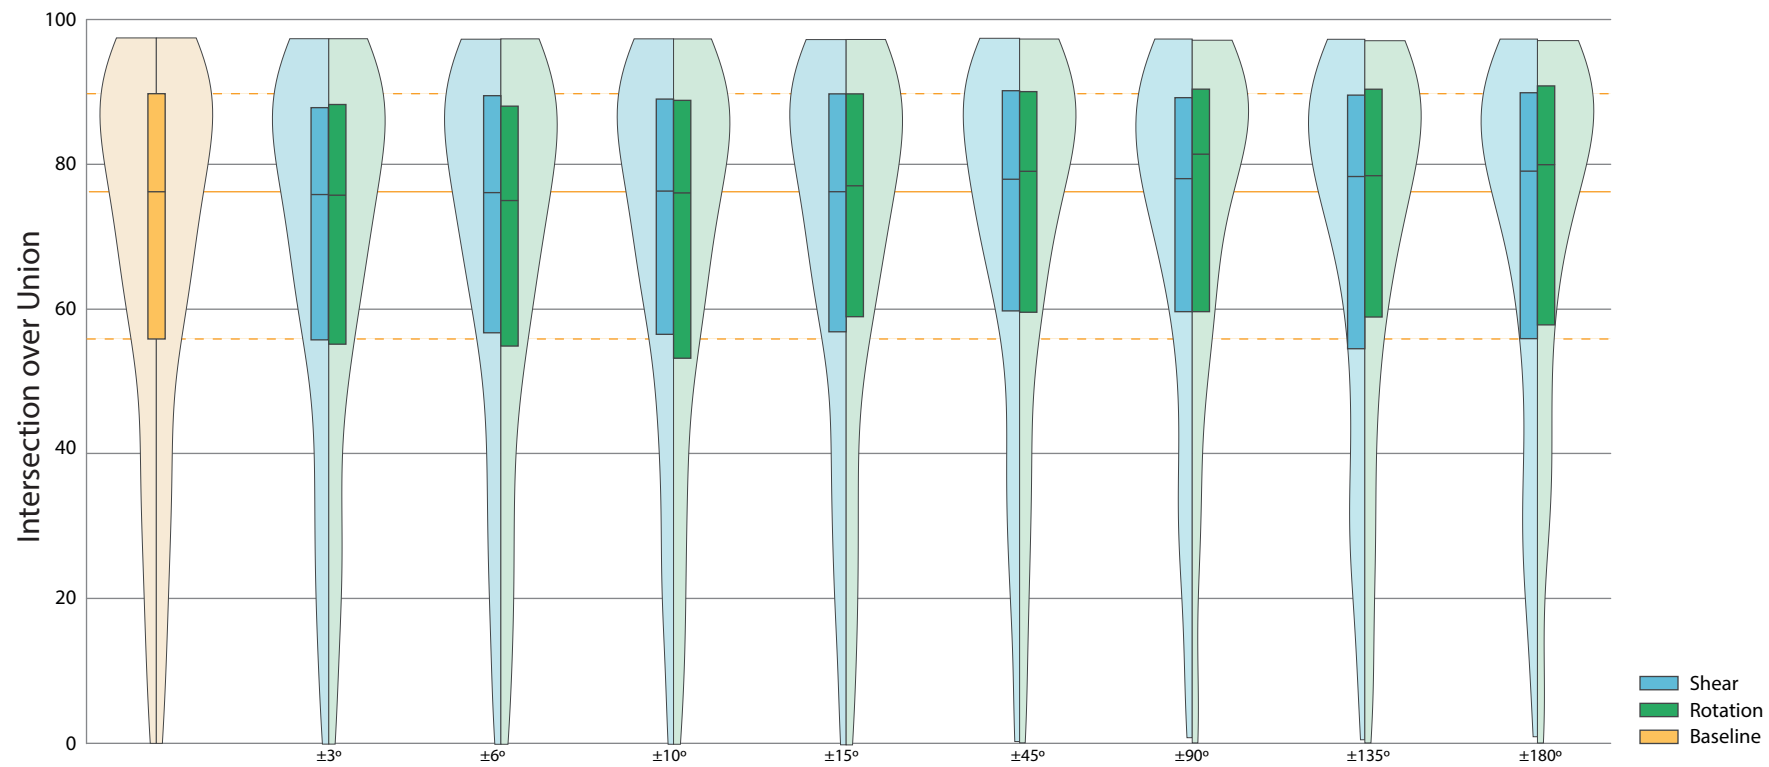

Fig S2.2. Results for rotation and shear for Kvasir-SEG. Baseline is included. Its median and quartiles are prolonged on the background for reference.

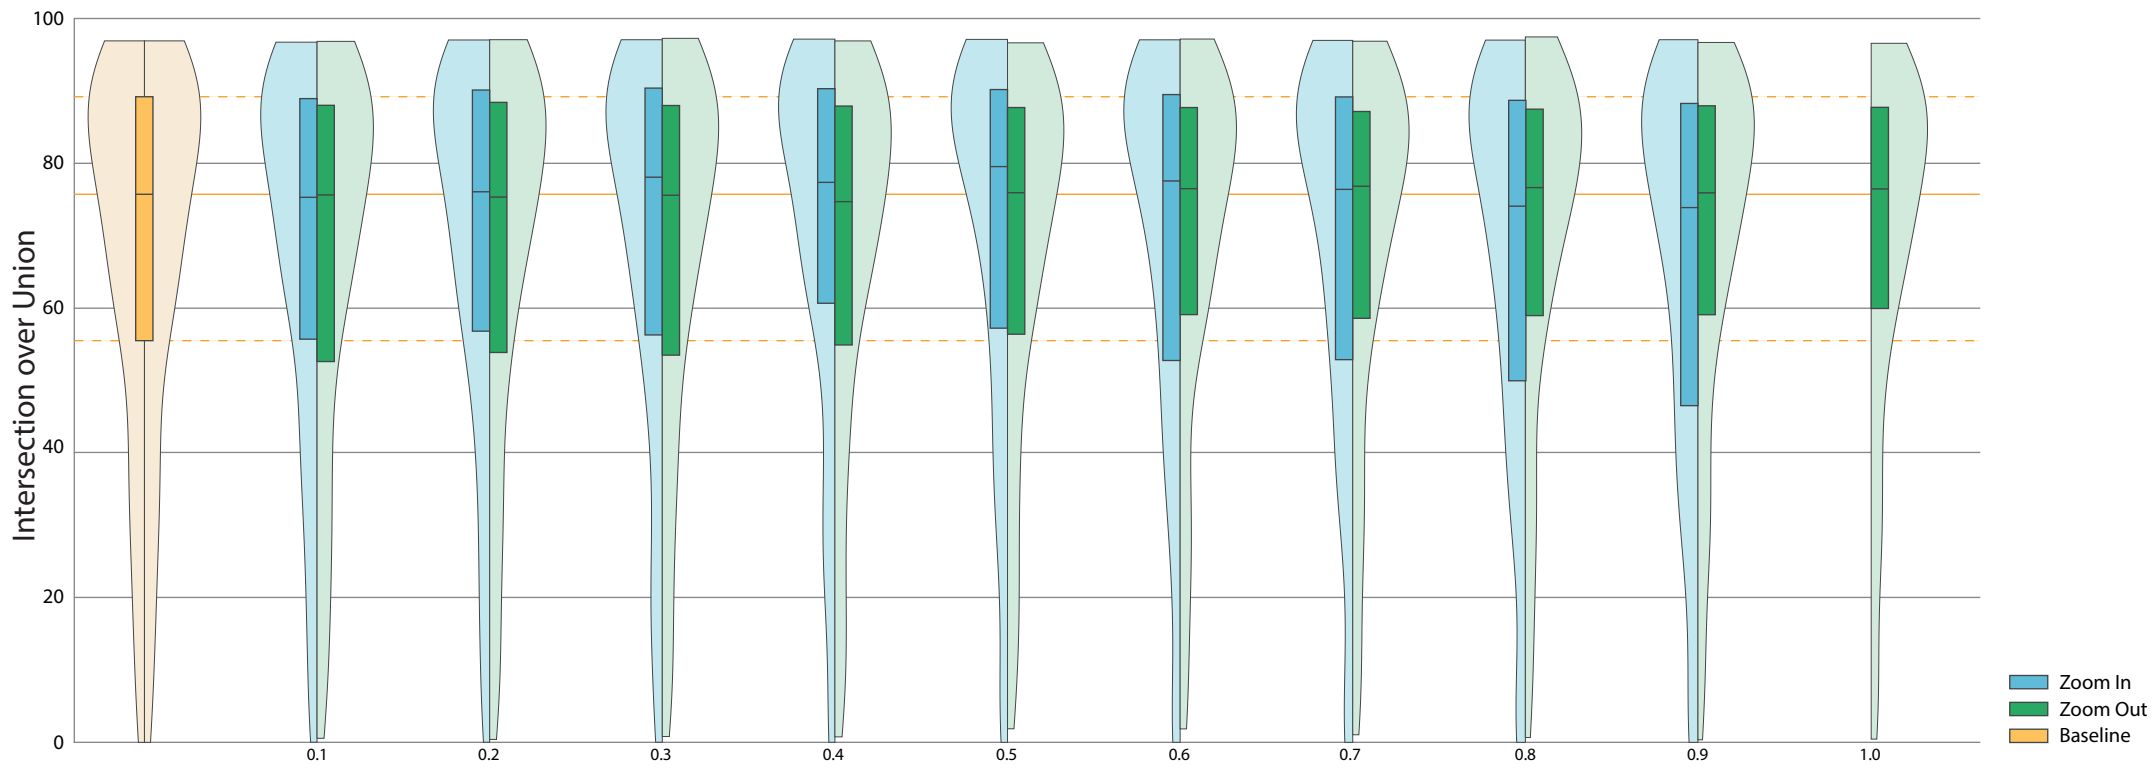

Fig S2.3. Results for zoom in and out for Kvasir-SEG. Baseline is included. Its median and quartiles are prolonged on the background for reference.

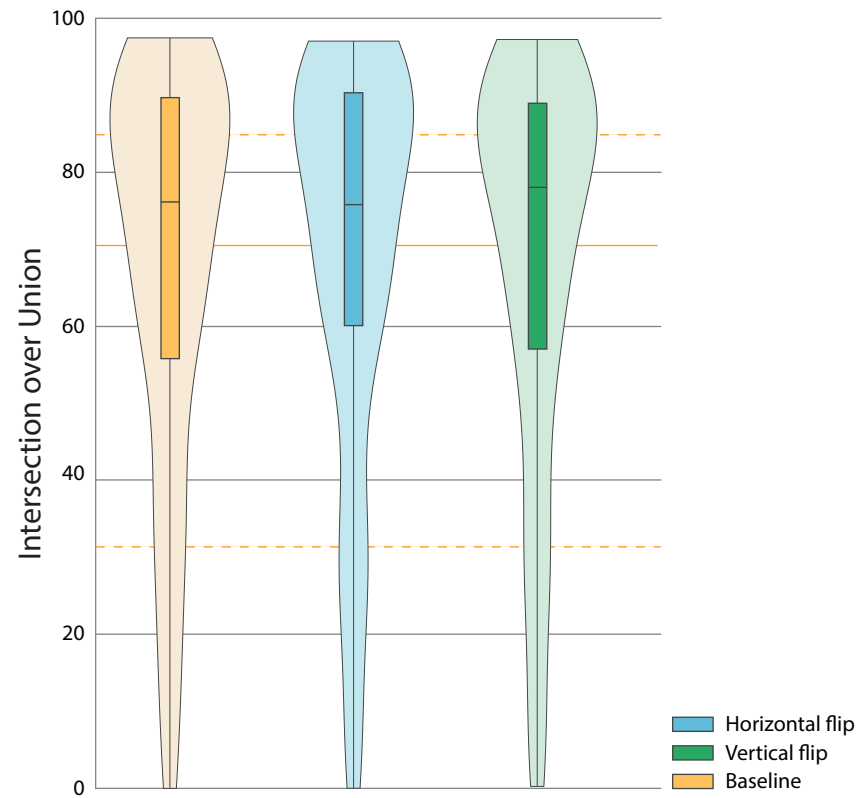

Fig S2.4. Results for horizontal and vertical flips for Kvasir-SEG. Baseline is included. Its median and quartiles are prolonged on the background for reference.

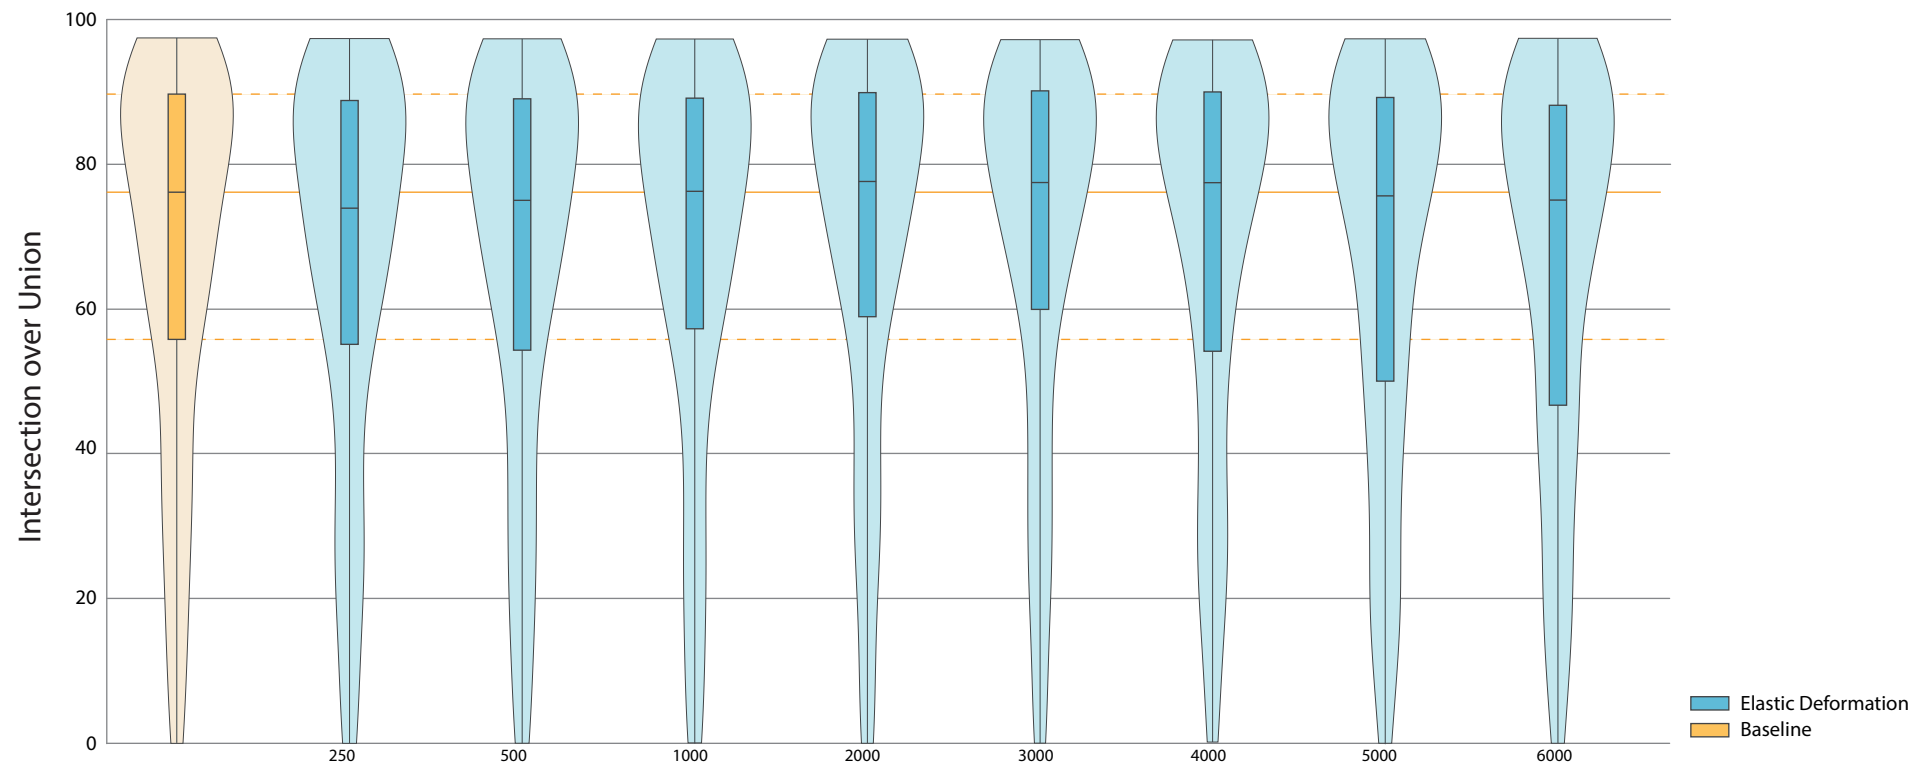

Fig S2.5. Results for elastic deformation for Kvasir-SEG. Baseline is included. Its median and quartiles are prolonged on the background for reference.

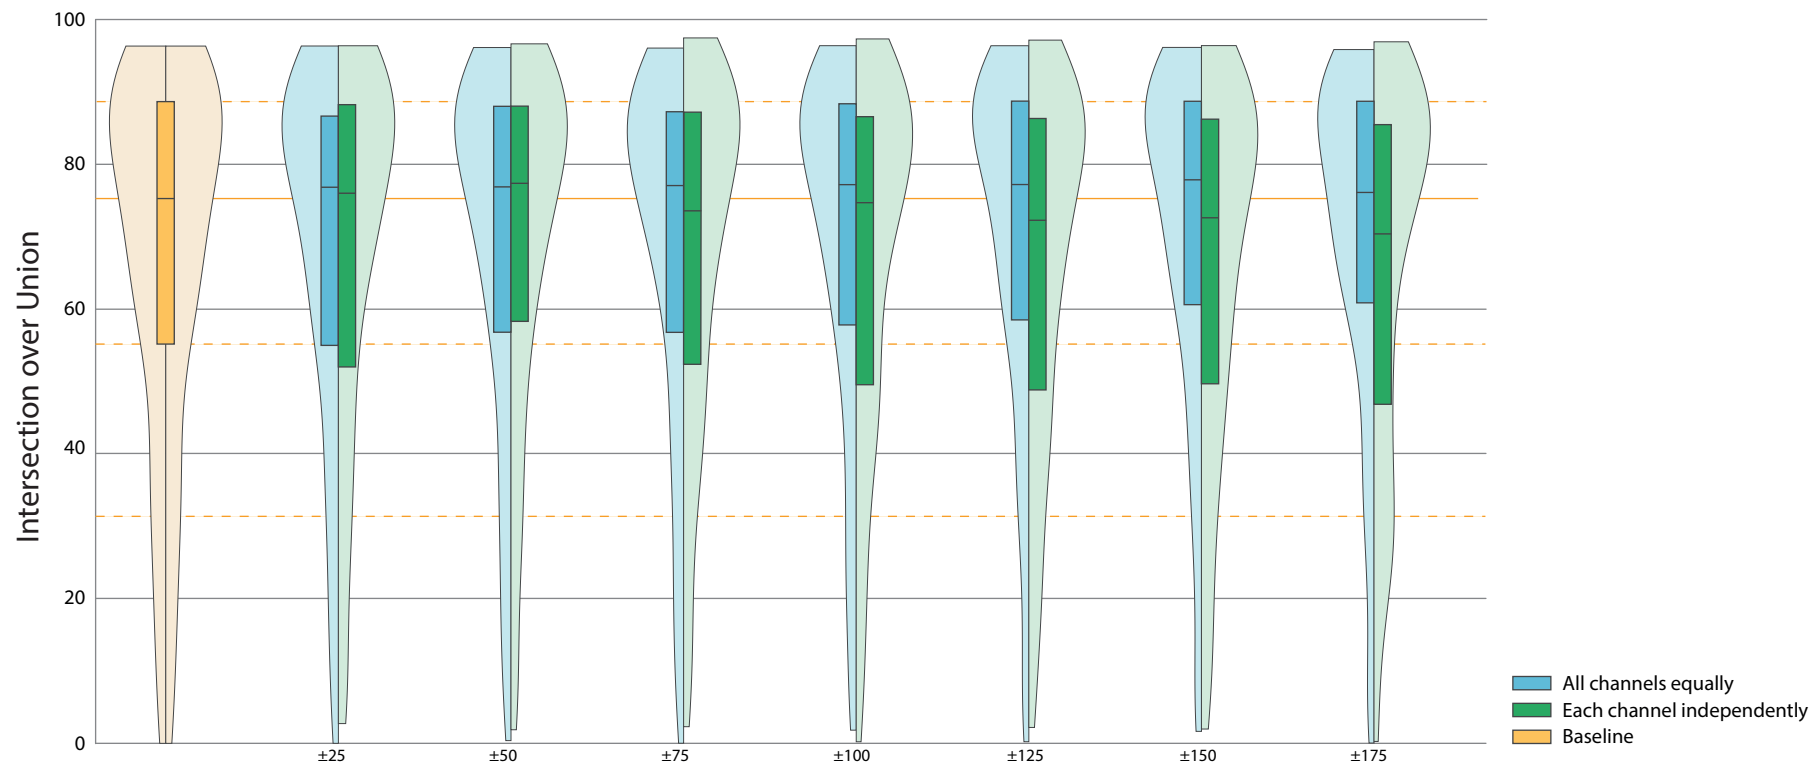

Fig S2.6. Results for changes in brightness for Kvasir-SEG. Baseline is included. Its median and quartiles are prolonged on the background for reference.

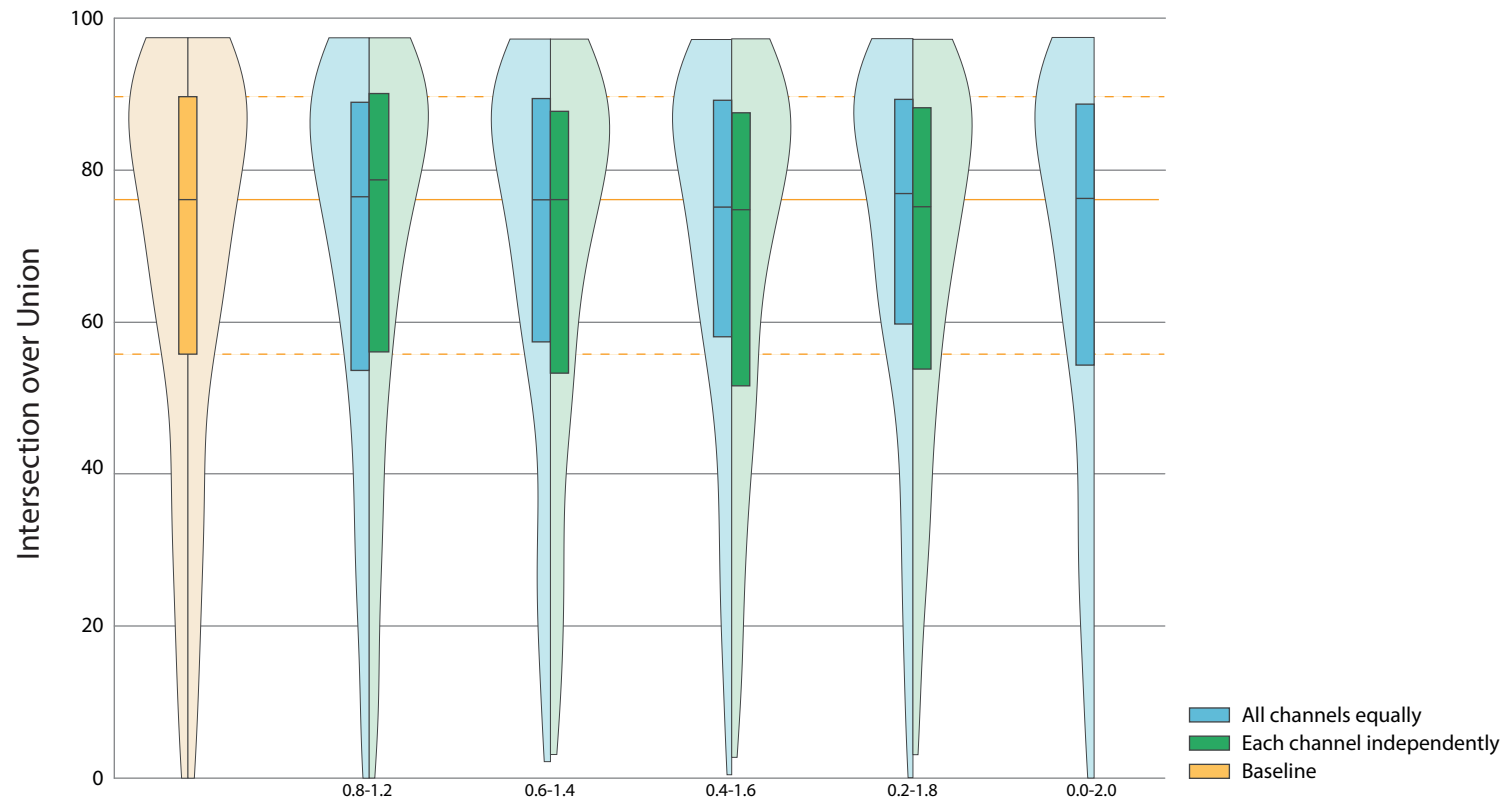

Fig S2.7. Results for changes in contrast for Kvasir-SEG. Baseline is included. Its median and quartiles are prolonged on the background for reference.

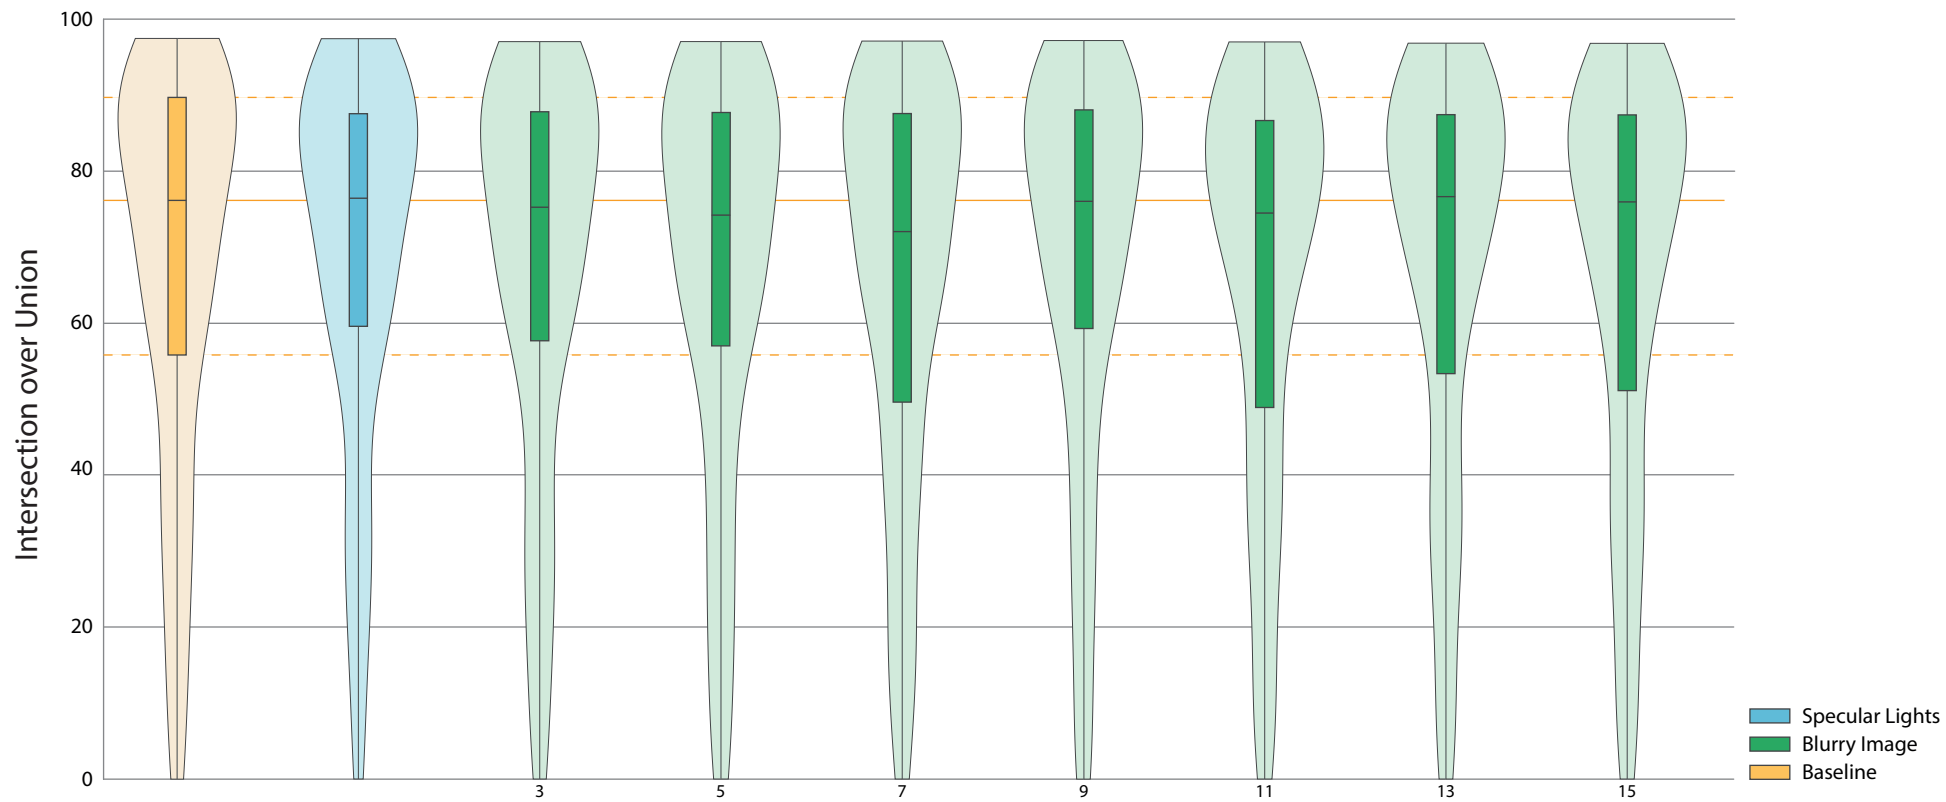

Fig S2.8. Results for inclusion of specular lights and blurry frames (mean filter) for Kvasir-SEG. Baseline is included. Its median and quartiles are prolonged on the background for reference.
